# Supplementary material for: A highly selective TPE-based AIE fluorescent probe is developed for the detection of Ag+
Source: Royal Society of Chemistry journal article supplement (doi:10.1039/c8ra03591a), 2018-01-01
Supplement: c8ra03591a1.pdf [file c8ra03591a1.pdf]

## Supporting Information

### A highly selective TPE-based AIE fluorescent probe for silver ion

Zhixiang Lu, Yunming Liu, Shuhan Lu, Yuan Li, Xiaolan Liu, Yu Qin, Liyan Zheng\*

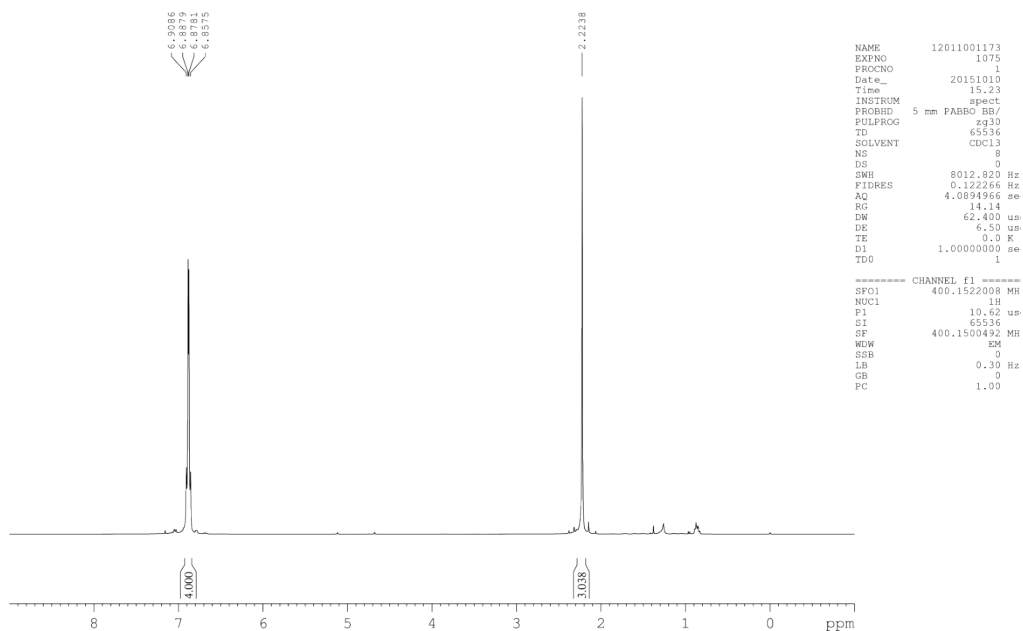

Figure S1.  $^1\text{H}$  NMR spectrum of compound (1) in  $\text{CDCl}_3$ .

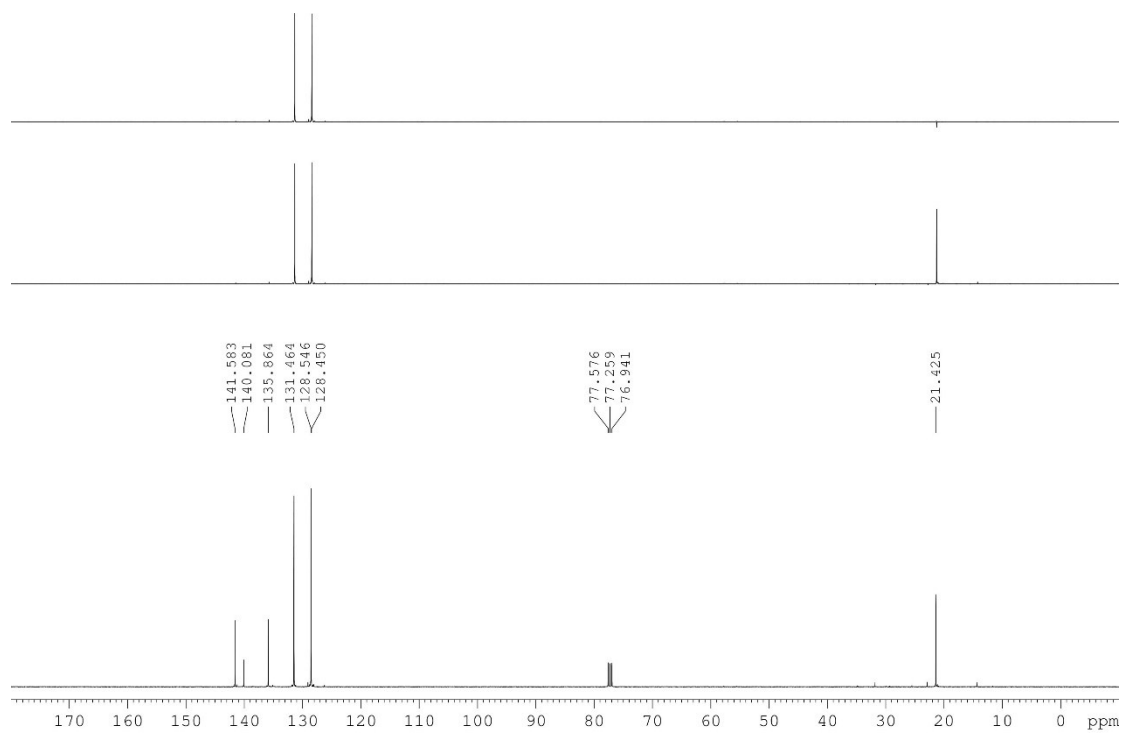

Figure S2.  $^{13}\text{C}$  NMR spectrum of compound (1) in  $\text{CDCl}_3$ .

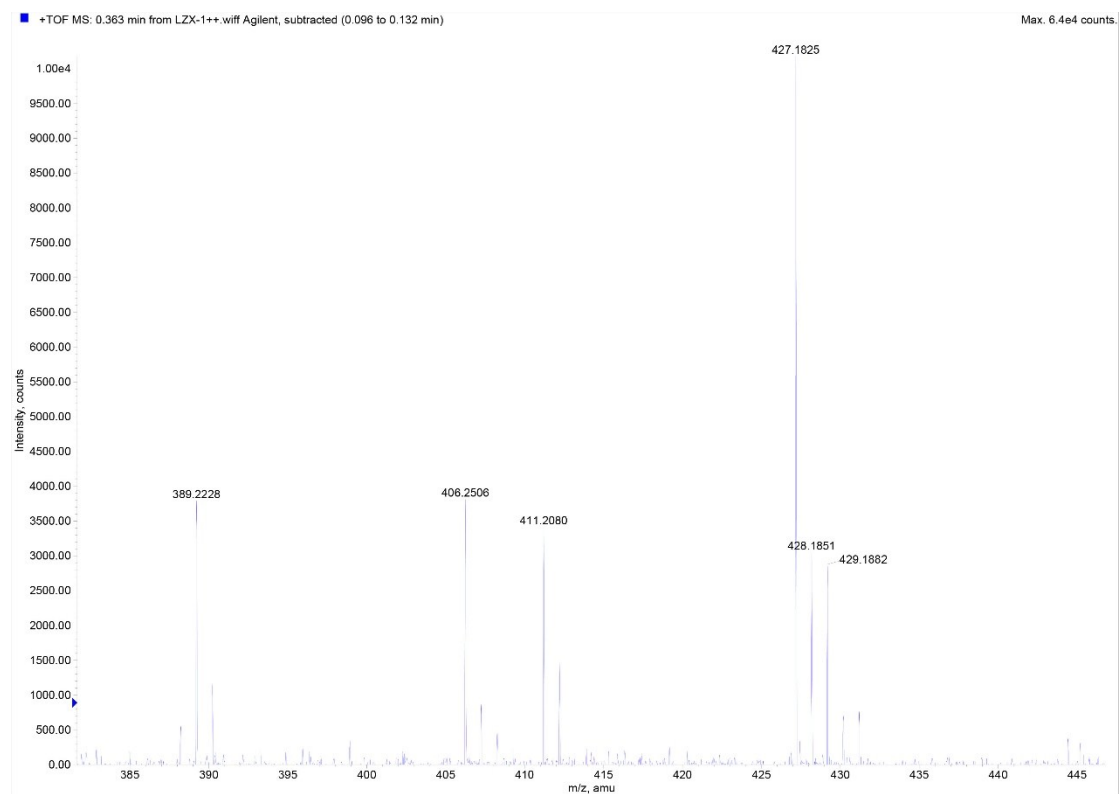

Figure S3. High-resolution mass spectrum of compound (1).

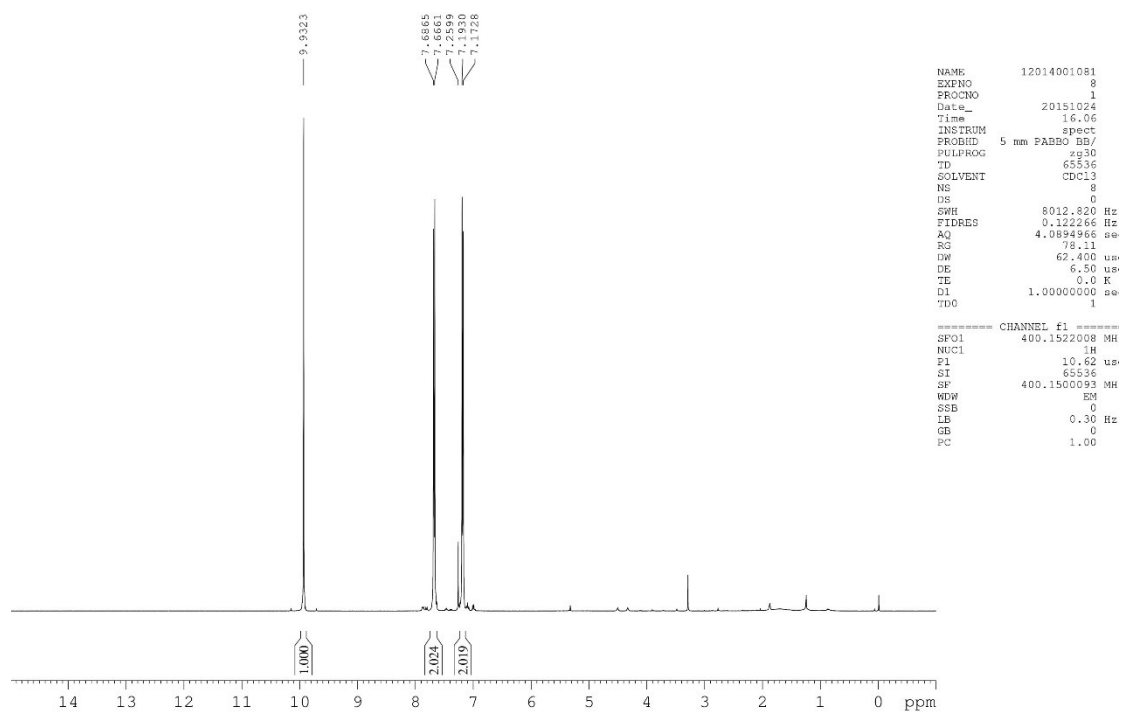

Figure S4.  $^1\text{H}$  NMR spectrum of compound (3) in  $\text{CDCl}_3$ .

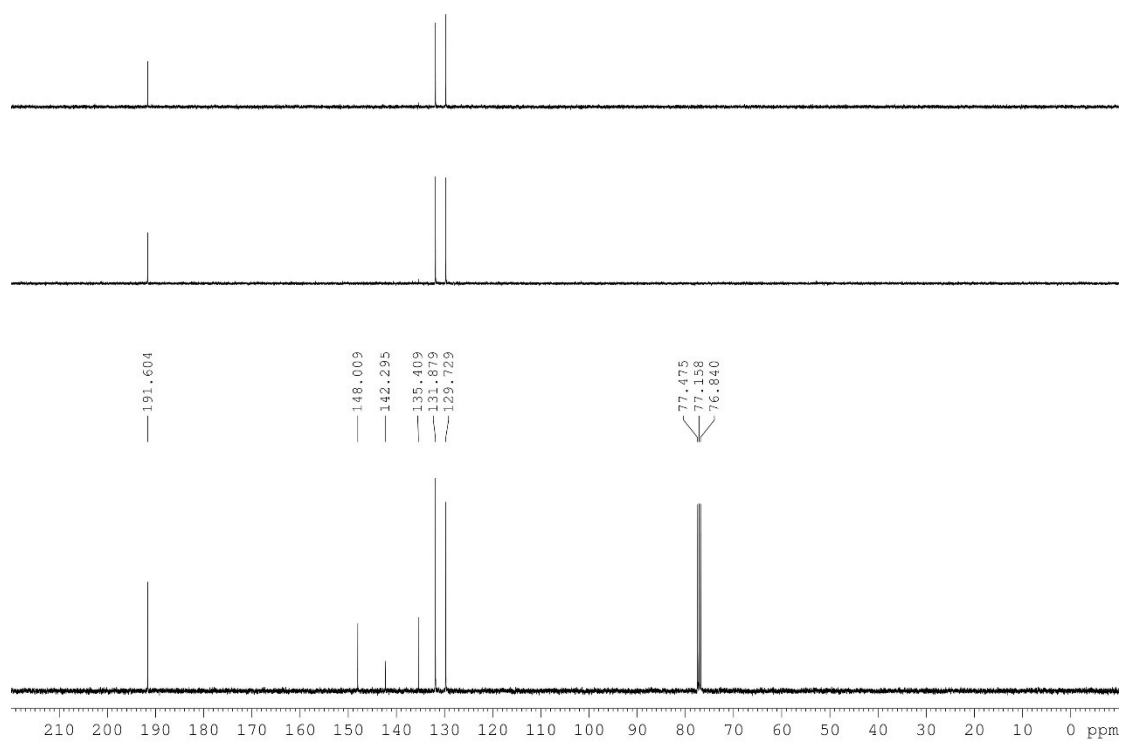

Figure S5.  $^{13}\text{C}$  NMR spectrum of compound (3) in  $\text{CDCl}_3$ .

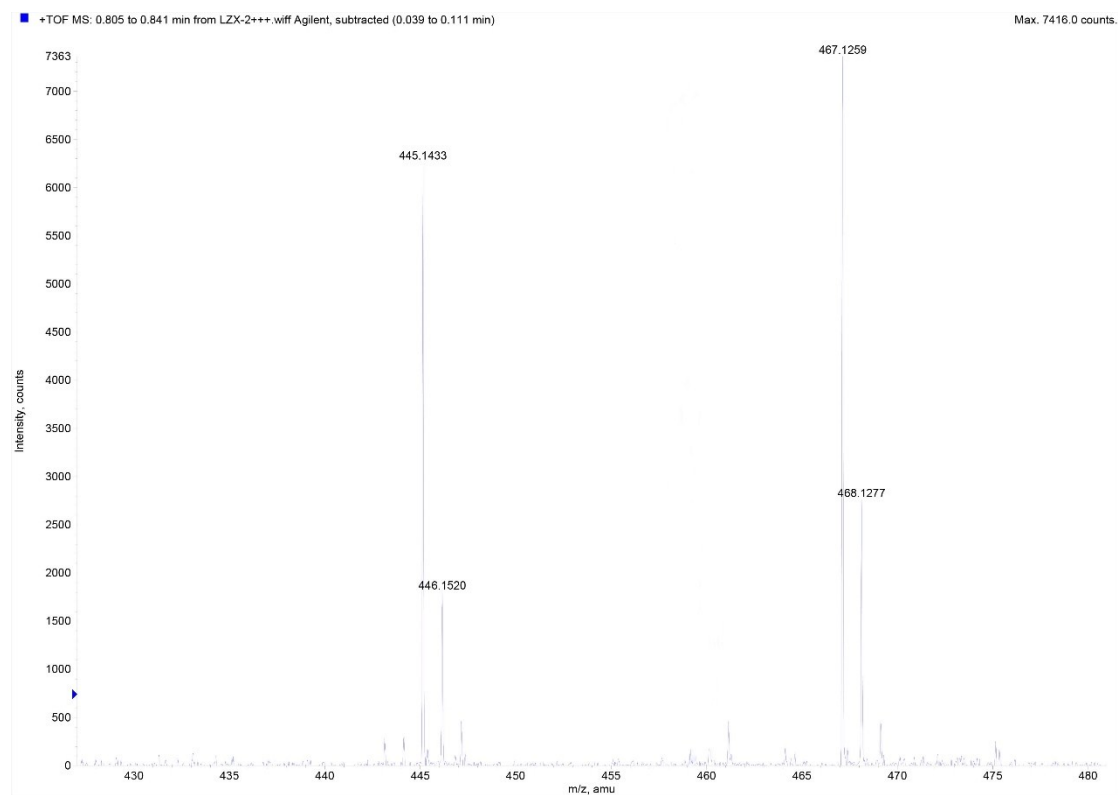

Figure S6. High-resolution mass spectrum of compound (3).

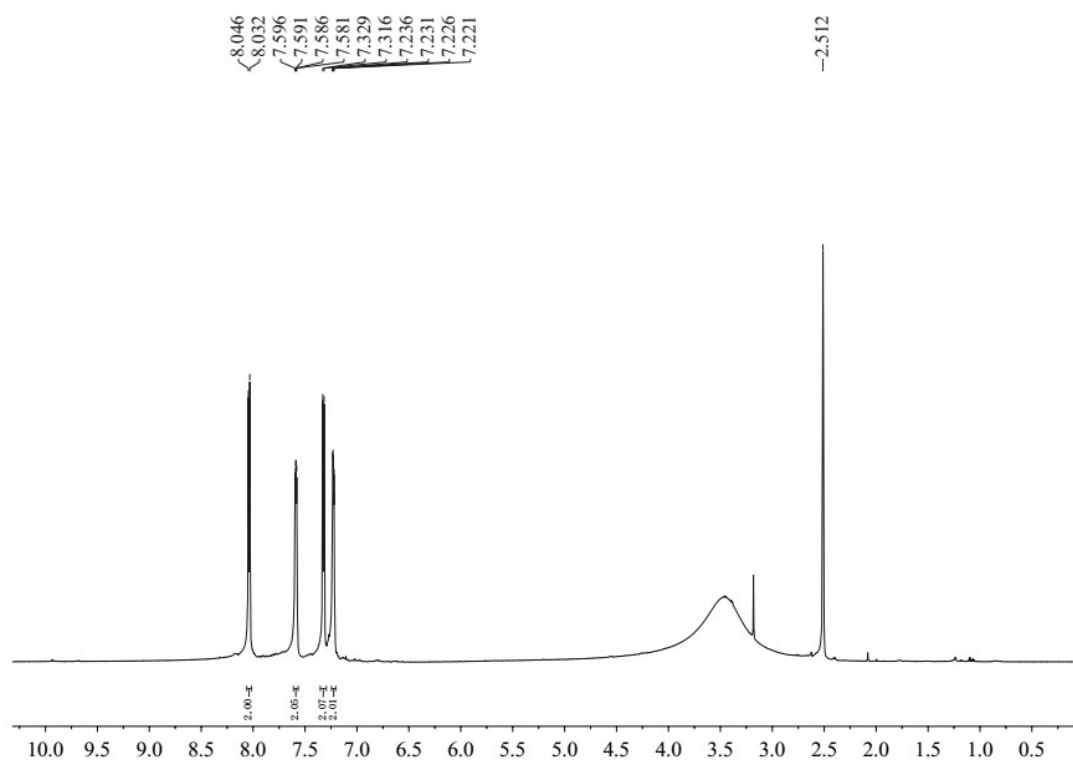

Figure S7.  $^1\text{H}$  NMR spectrum of compound (4) in  $\text{DMSO-}d_6$ .

DEPT 135

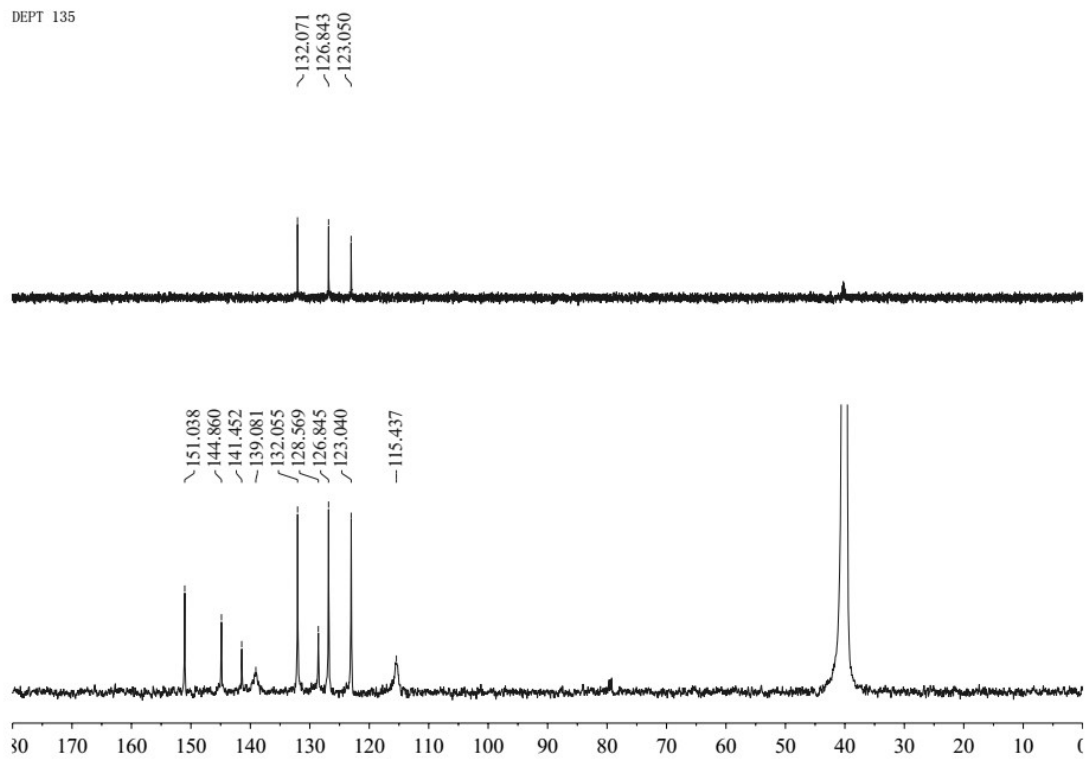

Figure S8.  $^{13}\text{C}$  NMR spectrum of compound (4) in  $\text{DMSO-}d_6$ .



Data File: F:\高分辨数据\cwz\1.lcd

| Elmt | Val. | Min | Max | Use Adduct |
|------|------|-----|-----|------|------|-----|-----|------|------|-----|-----|------|------|-----|-----|------------|
| H    | 1    | 0   | 100 | O    | 2    | 0   | 0   | P    | 3    | 0   | 0   | Zn   | 2    | 0   | 0   | H          |
| 2H   | 1    | 0   | 0   | 18O  | 2    | 0   | 0   | S    | 2    | 0   | 10  | Se   | 2    | 0   | 0   |            |
| B    | 3    | 0   | 0   | F    | 1    | 0   | 0   | Cl   | 1    | 0   | 0   | Br   | 1    | 0   | 0   |            |
| C    | 4    | 0   | 75  | Na   | 1    | 0   | 0   | K    | 1    | 0   | 0   |      |      |     |     |            |
| N    | 3    | 0   | 8   | Si   | 4    | 0   | 0   | Mn   | 3    | 0   | 0   |      |      |     |     |            |

Error Margin (ppm): 100  
 HC Ratio: unlimited  
 Max Isotopes: all  
 MSn Iso RI (%): 75.00

DBE Range: -2.0 - 1000.0  
 Apply N Rule: yes  
 Isotope RI (%): 1.00  
 MSn Logic Mode: AND

Electron Ions: both  
 Use MSn Info: no  
 Isotope Res: 10000  
 Max Results: 500

Event#: 1 MS(E+) Ret. Time: 0.653 -> 0.680 - 0.453 <-> 1.253 Scan#: 99 -> 103 - 69 <-> 189

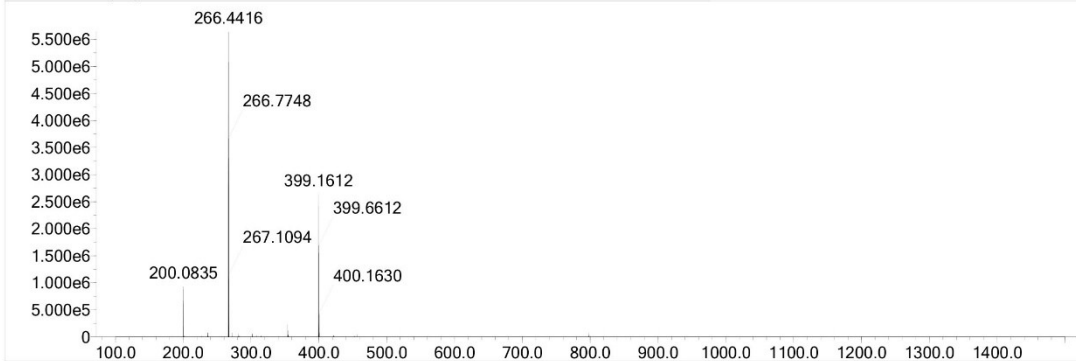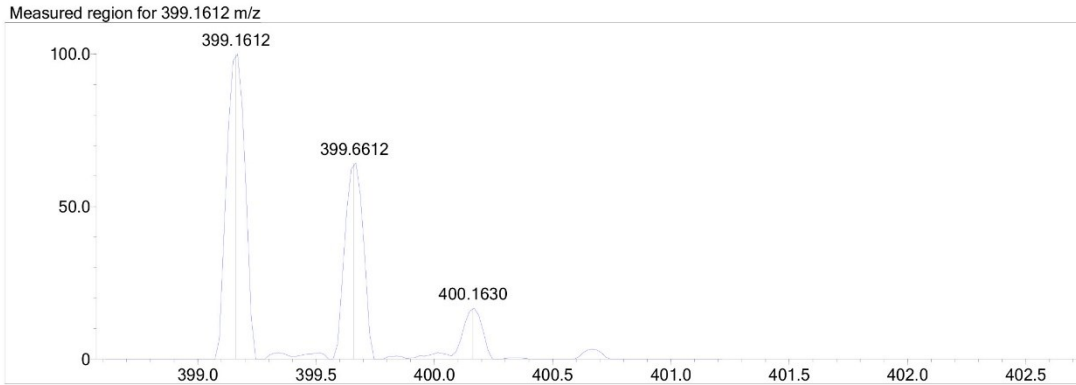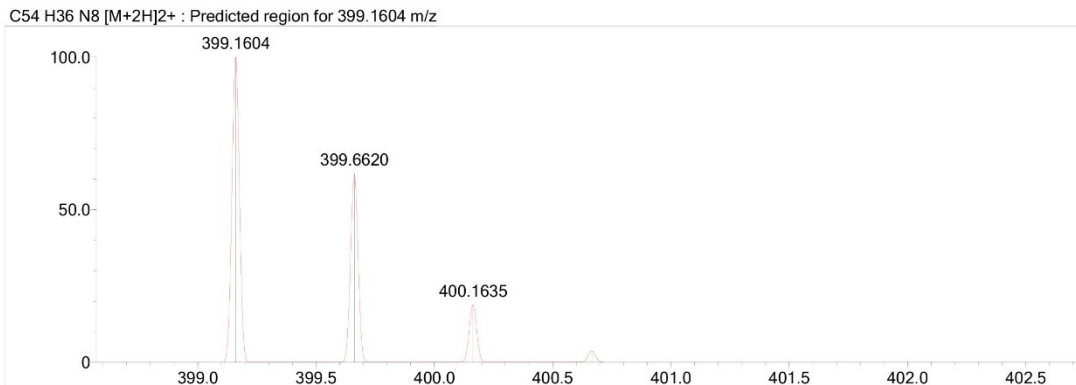

| Rank | Score | Formula (M) | Ion      | Meas. m/z | Pred. m/z | Df. (mDa) | Df. (ppm) | Iso   | DBE  |
|------|-------|-------------|----------|-----------|-----------|-----------|-----------|-------|------|
| 1    | 88.52 | C54 H36 N8  | [M+2H]2+ | 399.1612  | 399.1604  | 0.8       | 2.00      | 90.79 | 41.0 |

Figure S9. High-resolution mass spectrum of compound (4).

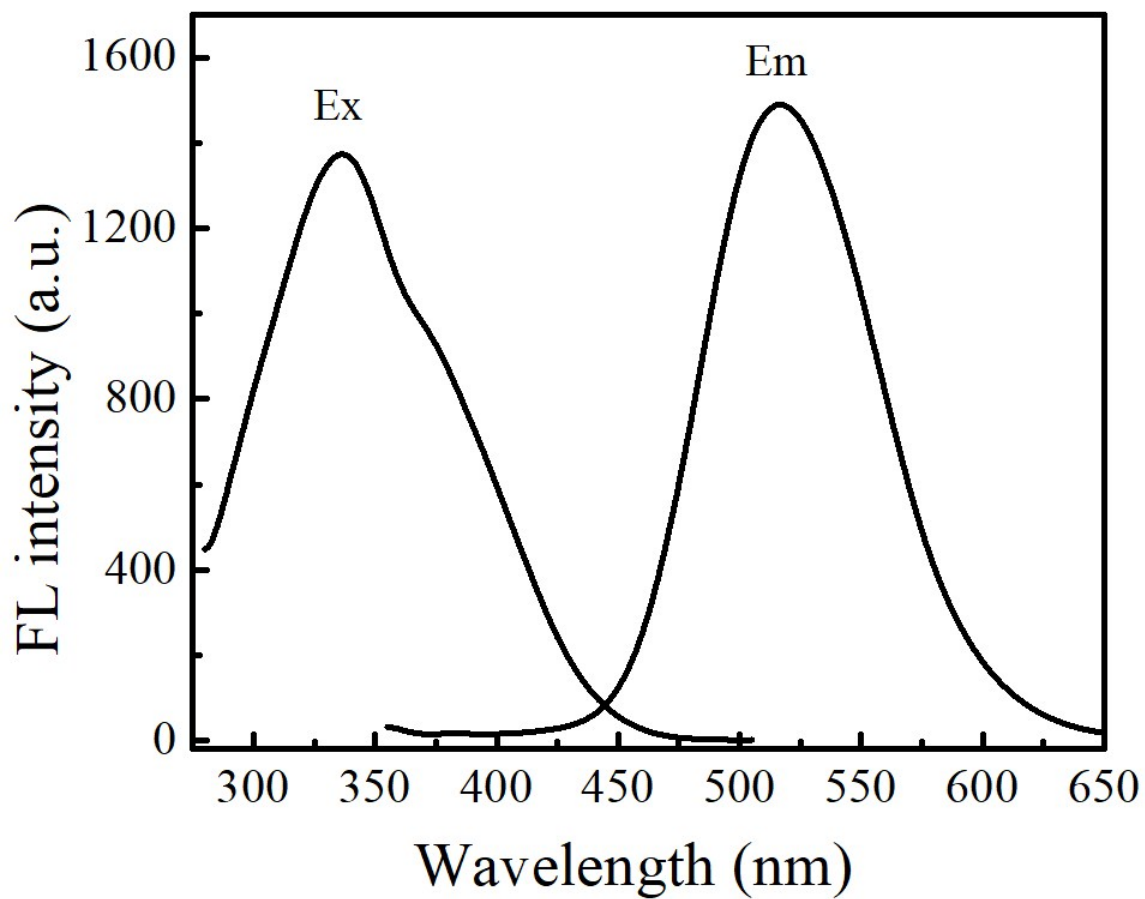

Figure S10 Emission spectra and excitation spectra of TBI-TPE CH<sub>3</sub>OH/ water=80 %, concentration = 10  $\mu$ M. Ex=335 nm, Em=525 nm.

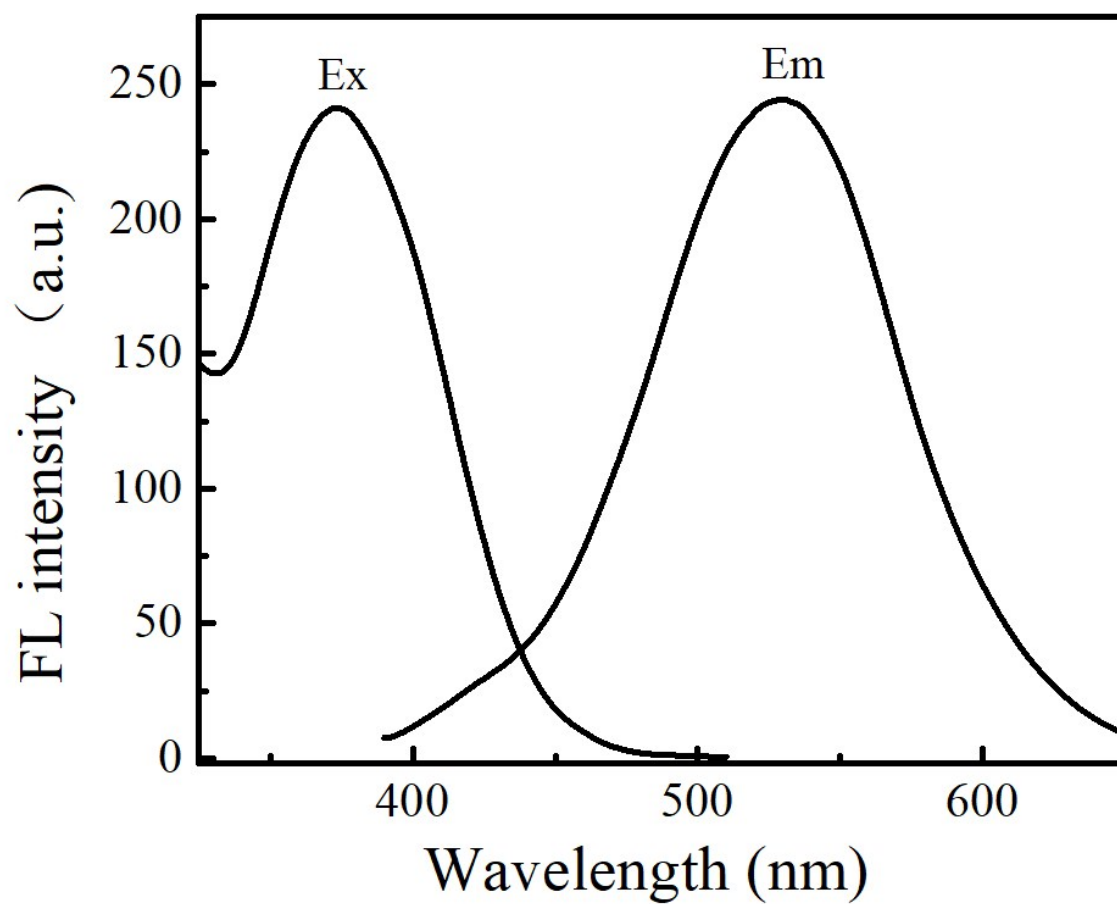

Figure S11 Emission spectra and excitation spectra of TBI-TPE in CH<sub>3</sub>OH in the presence of Ag<sup>+</sup> (4 μM). Ex=370 nm, Em=525 nm.

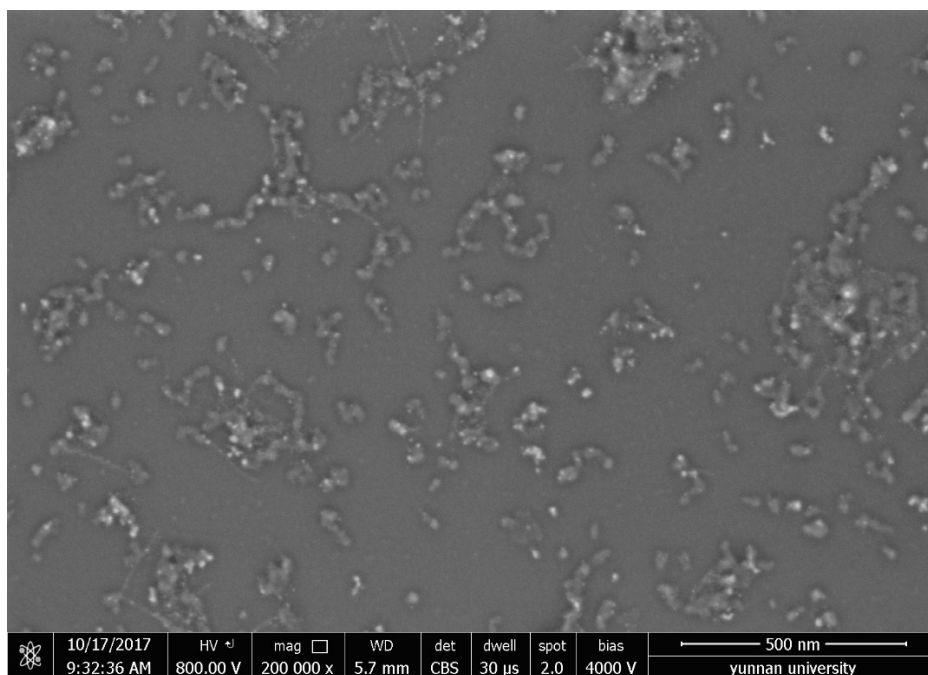

Figure S12 SEM image of complex

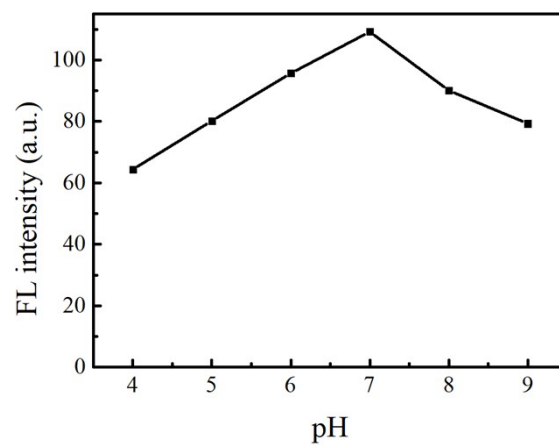

Figure S13 The effect of pH on the fluorescence intensities at 525 nm between  $\text{Ag}^+$  and the probe (TBI-TPE=4  $\mu\text{M}$ ,  $\text{Ag}^+$  =12  $\mu\text{M}$ ). ( $\lambda_{\text{ex}}$  = 370 nm)

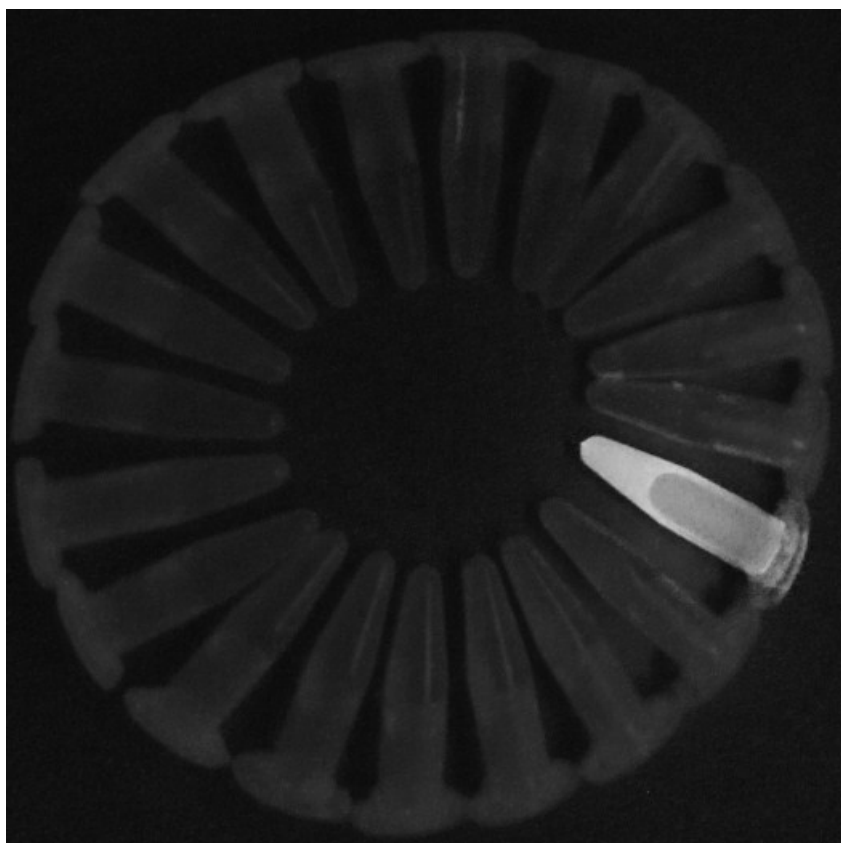

Figure S14 Images of TBI-TPE in presence of a series of metal ions under UV light illumination ( $\lambda_{\text{ex}}=365\text{ nm}$ ).
